# Supplementary material
Source: Royal Society of Chemistry journal article supplement (doi:10.1039/d6fo01189f)
Supplement: d6fo01189f2.pdf [file d6fo01189f2.pdf]

## Supplementary Materials

**Table S1. The primer of qPCR**

| Gene                           | Forward-Primer Sequence (5' to 3') | Reverse-Primer Sequence (5' to 3') |
|--------------------------------|------------------------------------|------------------------------------|
| <i>Actb</i>                    | GTGGATCAGCAAGCAGGAGT               | ACGCAGCTCAGTAACAGTCC               |
| <i>Tnf-<math>\alpha</math></i> | GCACCACCATCAAGGACTCA               | GAGGCAACCTGACCACTCTC               |
| <i>Il-1<math>\beta</math></i>  | GAGCACAAGCCTGTCTTCCT               | TCTTGGCCGAGGACTAAGGA               |
| <i>Il-6</i>                    | GAGACTTCCATCCAGTTGCCT              | TCTCCTCTCCGGACTTGTGA               |
| <i>Occludin</i>                | TGAACTGTGGATTGGCAGC                | CAAGATAAGCGAACCTTGGCG              |
| <i>Claudin1</i>                | CTTCTCTGGGATGGATCGGC               | CACAGTCCCTCGTAGATGGC               |
| <i>ZO-1</i>                    | GCACCATGCCTAAAGCTGTC               | ACTCAACACACCACCATTGC               |
| <i>Cat</i>                     | GCGGATTCCTGAGAGAGTGG               | TGTGGAGAATCGAACGGCAA               |
| <i>Sod</i>                     | ACAAGGCTGTACCAGTGCAG               | ACATGCCTCTCTTTCATCCGC              |
| <i>Gpx</i>                     | CCACGTGATCTCAGCCACCAT              | AAGGCATACACGGTGGACTG               |
| <i>Clock</i>                   | TCCTACCTTCGCCACACAAC               | CTGGCTGCTGAACTGAAGGA               |
| <i>Bmall</i>                   | ATGCCAAGACTGGACTTCCG               | ACAGGTAGAGGGCGAAGTCCT              |

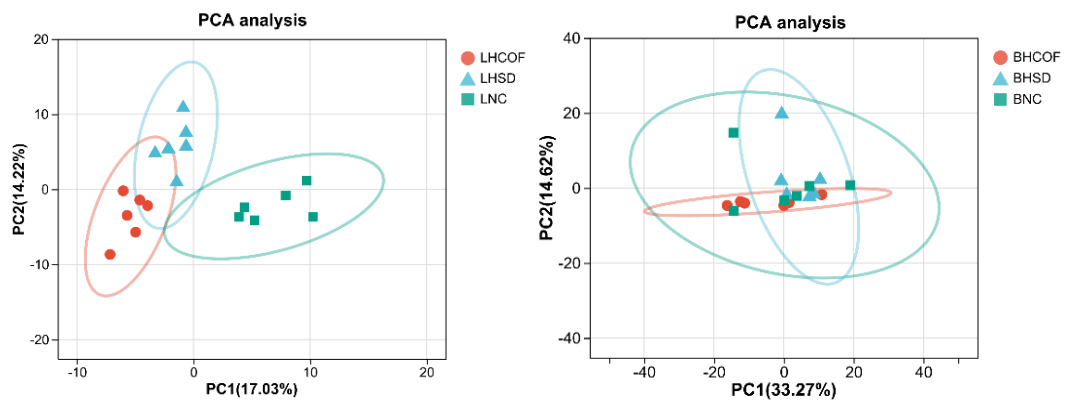

**Fig. S1.** Principal component analysis plot of the transcriptomes of the liver (left) and the brain (right).

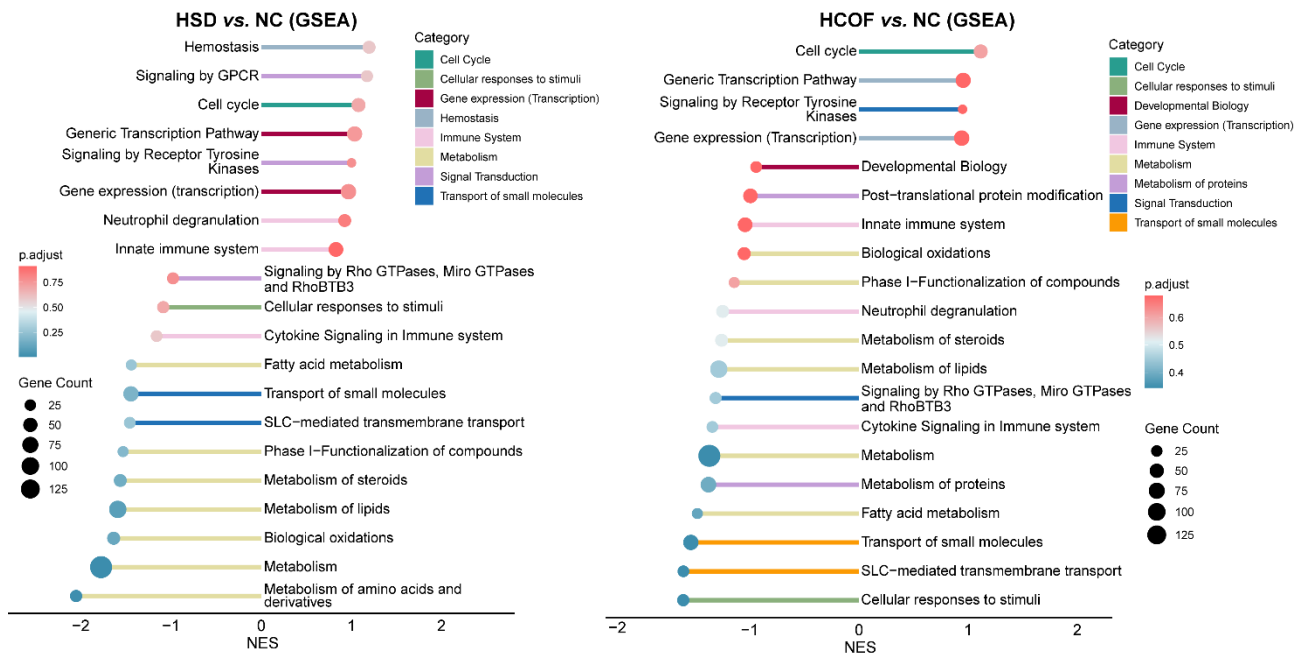

**Fig. S2.** Differential liver gene set enrichment analysis (GSEA) between the HSD and NC groups (left); Differential liver gene GSEA analysis between the HCOF and NC groups (right).

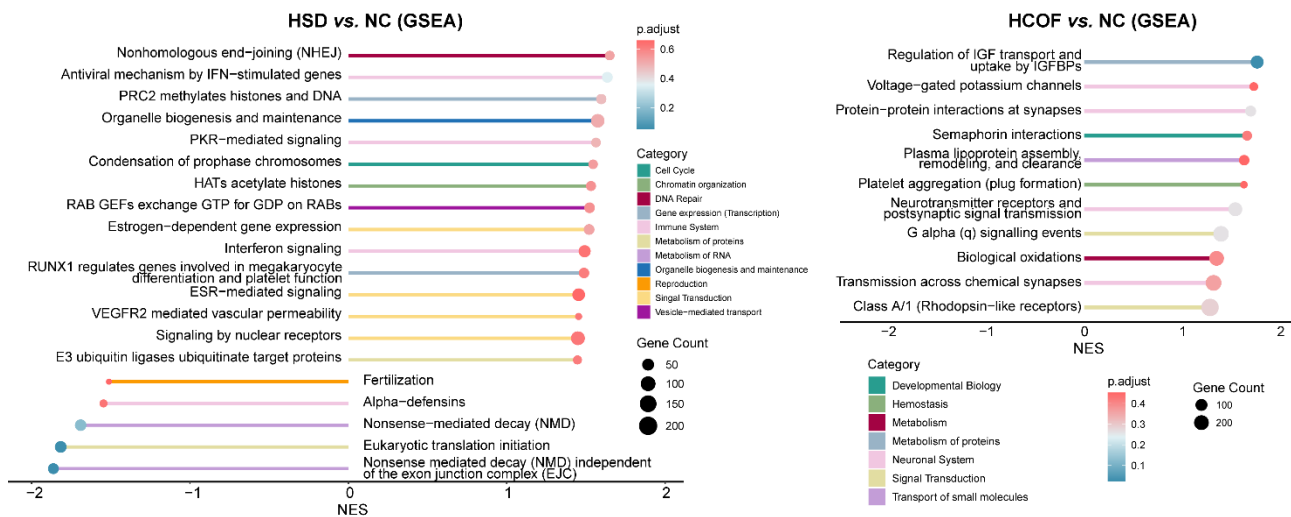

**Fig. S3.** Brain gene set enrichment analysis (GSEA) between the HSD and NC groups (left); Brain GSEA analysis between the HCOF and NC groups (right).
