# Supplementary material
Source: Royal Society of Chemistry journal article supplement (doi:10.1039/d6fo01189f)
Supplement: d6fo01189f3.pdf [file d6fo01189f3.pdf]

**Table S8. Directionality of core-core edges in the multi-omics correlation networks.**

| Network | Degree cutoff | Positive edges (%) | Negative edges (%) | Total edges |
|---------|---------------|--------------------|--------------------|-------------|
| HSD     | $\geq 1$      | 43.7               | 56.3               | 602         |
|         | $\geq 13$     | 33.1               | 66.9               | 269         |
| HCOF    | $\geq 1$      | 50.8               | 49.2               | 667         |
|         | $\geq 12$     | 52.7               | 47.3               | 298         |

**Note:** Degree cutoffs were adjusted between groups to yield comparable numbers of core-core edges and ensure balanced network visualization.
